# Supplementary material for: Comprehensive Genetic Analysis of Druze Provides Insights into Carrier Screening
Source: MDPI journal article supplement (doi:10.3390/genes14040937), 2023-04-18
Supplement: s1 [file s1]

**Table S1.** Potentially clinically relevant genes and variants from the exome sequencing analysis which were previously associated with the Druze population.

| Rs Number    | ClinVar ID <sup>a</sup> | Condition <sup>b</sup>                                | Gene (OMIM#)   | Nucleotide Alteration (Amino Acid)                             | Mutation type    | Location <sup>c</sup>     | Durze AF (AC/AN) | Heterozygous/ Homozygous | General Population AF (AC/AN) | Fisher's p-value | Middle East AF (AC/AN) |
|--------------|-------------------------|-------------------------------------------------------|----------------|----------------------------------------------------------------|------------------|---------------------------|------------------|--------------------------|-------------------------------|------------------|------------------------|
| rs104894176  | 13709 (2, P)            | Familial hemophagocytic lymphohistiocytosis 2 (AR)    | PRF1 (170280)  | NC_000010.11:g.70598599C>T                                     | Nonsense         | 10 - 70598599 C > T       | 0.004 (1/236)    | 1/0                      | 2.6e-5 (4/152194)             | 0.008            | 0 (0/316)              |
| rs781266802  | 189015 (2, P/LP)        | Wilson's disease (AR)                                 | ATP7B (277900) | NM_000053.4:c.3649_3654del (NP_000044.2:p.Val1217_Leu1218 del) | Inframe deletion | 13 - 51939095 TCAGAAC > T | 0.004 (1/236)    | 1/0                      | 1.3e-05 (2/152192)            | 0.005            | 0 (0/316)              |
| rs104894318  | 3802 (2, P)             | Tyrosinase-negative oculocutaneous albinism (AR)      | TYR (606933)   | NM_000372.5:c.1342G>A (NP_000363.1:p.Asp448Asn)                | Missense         | 11 - 89284930 G > A       | 0.004 (1/236)    | 1/0                      | 7.6e-06 (2/264690)            | 0.003            | NA                     |
| rs756959430  | 437454 (2, P)           | Mucopolysaccharidosis III Gamma (AR)                  | GNPTG (252605) | NM_032520.5:c.499dupC (NP_115909.1:p.Leu167fs)                 | Frameshift       | 16 - 1362287 A > AC       | 0.008 (2/236)    | 2/0                      | 3.3e-5 (5/151942)             | 5e-5             | 0 (0/316)              |
| rs587779815  | 127337 (2, P/LP)        | Ataxia-telangiectasia syndrome (AR)                   | ATM (208900)   | NM_000051.4:c.1339C>T (NP_000042.3:p.Arg447Ter)                | Nonsense         | 11 - 108250804 C > T      | 0.008 (2/236)    | 2/0                      | 1.3e-5 (2/151854)             | 1.4e-5           | 0 (0/316)              |
| rs1370579526 | 559417 (1, P)           | Combined oxidative phosphorylation deficiency 42( AR) | GATC (617210)  | NM_176818.3:c.233T>G (NP_789788.1:p.Met78Arg)                  | Missense         | 12 - 120446808 T > G      | 0.008 (2/236)    | 2/0                      | 4e-6 (1/247366)               | 2.7e-6           | NA                     |

|              |                |                                    |                 |                                                   |                  |                       |              |     |                    |          |              |
|--------------|----------------|------------------------------------|-----------------|---------------------------------------------------|------------------|-----------------------|--------------|-----|--------------------|----------|--------------|
| rs121965022  | 11914 (2, P)   | Mucopolysaccharidosis type I (AR)  | IDUA (252800)   | NM_000203.5:c.192C>A (NP_000194.2:p.Tyr64Ter)     | Nonsense         | 4 - 987842 C > A      | 0.01 (3/236) | 3/0 | 1.3e-05 (2/152204) | 3.7e-8   | 0 (0/316)    |
| rs1555547112 | 520436 (1, P)  | Nonsyndromic hearing loss 3 (AR)   | MYO15A (602666) | NM_016239.4:c.9083+6T>A                           | Intron           | 17 - 18158644 T > A   | 0.02 (4/236) | 4/0 | NA                 | NA       | NA           |
| rs28940579   | 2540 (2, P/LP) | Familial Mediterranean fever (AR)  | MEFV (608107)   | NC_000016.10:g.3243310A>G                         | Missense         | 16 - 3243310 A > G    | 0.02 (5/236) | 5/0 | 0.001 (219/152066) | 2.9e-5   | 0.01 (4/316) |
| rs397509360  | 29 (2, P)      | Primary hyperoxaluria, type 3 (AR) | HOGA1 (613597)  | NM_138413.4:c.938AGG[2] (NP_612422.2:p.Glu315del) | Inframe deletion | 10- 97611611 TGAG > T | 0.03(6/236)  | 6/0 | 0.0003 (41/152222) | 1.31e-10 | 0 (316/0)    |

a Number of stars and pathogenic level (A- Association, P- Pathogenic or LP- Likely Pathogenic, VUS- variant of uncertain significance) as labeled by Clinvar. b Autosomal Dominant= AD ; Autosomal Recessive= AR ; X-linked Dominant= XLD ; Multifactorial= M. c Chromosome - Position Reference > Alternative. d Variant in a low complexity region according to GnomAD.

**Table S2.** Potentially clinically relevant genes and variants from the HGDP genome sequencing analysis which were previously associated with the Druze population.

| Rs Number  | ClinVar ID <sup>a</sup> | Condition <sup>b</sup>               | Gene (OMIM#)     | Nucleotide Alteration (Amino Acid)             | Mutation type | Location <sup>c</sup> | Durze AF (AC/AN) | Heterozygous/ Homozygous | General Population AF (AC/AN) | Fisher's p-value | Middle East AF (AC/AN) |
|------------|-------------------------|--------------------------------------|------------------|------------------------------------------------|---------------|-----------------------|------------------|--------------------------|-------------------------------|------------------|------------------------|
| rs62638191 | 8003(2, P/LP)           | Pigmentary retinal dystrophy (AR/AD) | RDH5 (601617)    | NM_002905.5:c.712G>T (NP_002896.2:p.Gly238Trp) | Missense      | 12- 55724028 G > T    | 0.01 (1/80)      | 1/0                      | 0.0002 (30/152092)            | 0.02             | 0.003 (1/316)          |
| rs80338940 | 17029 (2, P)            | Deafness, type 1A (AR)               | GJB2 (121011)    | NC_000013.11:g.20192782C>T                     | Splice donor  | 13 - 20192782 C > T   | 0.01 (1/80)      | 1/0                      | 0.0003 (42/152092)            | 0.02             | 0.003 (1/316)          |
| rs28940578 | 2539 (1, P/VUS)         | Familial Mediterranean fever (AR)    | MEFV (608107)    | NC_000016.10:g.3243405C>T                      | Missense      | 16 - 3243405 C > T    | 0.01 (1/80)      | 1/0                      | 7.9e-05 (12/152204)           | 0.007            | 0.003 (1/316)          |
| rs28936701 | 7733 (2, P)             | Glaucoma 3A (AR)                     | CYP11B1 (601771) | NC_000002.12:g.38070949G>A                     | Missense      | 2 - 38070949 G > A    | 0.02 (2/80)      | 2/0                      | 5.3e-05 (8/152118)            | 1.2e-5           | 0.003(3/316)           |

a Number of stars and pathogenic level (A- Association, P- Pathogenic or LP- Likely Pathogenic, VUS- variant of uncertain significance) as labeled by Clinvar. b Autosomal Dominant= AD ; Autosomal Recessive= AR ; X-linked Dominant= XLD ; Multifactorial= M. c Chromosome - Position Reference > Alternative. d Variant in a low complexity region according to GnomAD.
